# Supplementary material
Source: Springer Nature journal article supplement (https://www.springermedizin.de/resource/supplementary/12947_2012_439_MOESM6_ESM.pdf/9555760)

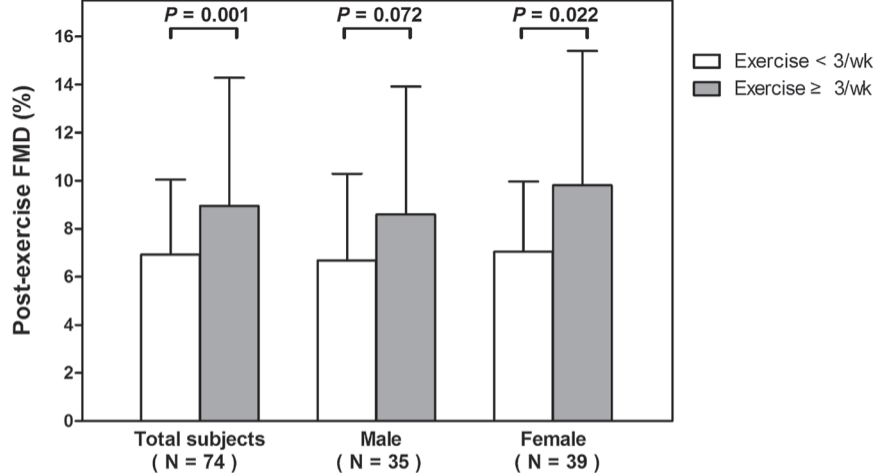

|                        | Exercise < 3/week | Exercise ≥ 3/week | P value            |
|------------------------|-------------------|-------------------|--------------------|
| <b>Total (N = 74)</b>  | 6.92 ± 3.13       | 8.95 ± 5.33       | 0.001 (F = 11.220) |
| <b>Male (N = 35)</b>   | 6.68 ± 3.61       | 8.59 ± 5.33       | 0.072              |
| <b>Female (N = 39)</b> | 7.05 ± 2.91       | 9.81 ± 5.59       | 0.022 (F = 5.692)  |

Supplement: MOESM6 [file 9555760]
